# Supplementary material
Source: PubMed Central journal article supplement (PMC2877194)
Supplement: NIHMS197795-supplement-1.pdf [file NIHMS197795-supplement-1.pdf]

Type of file: figure

Label: figure

Filename: 197795 - Supplementary figure.pdf

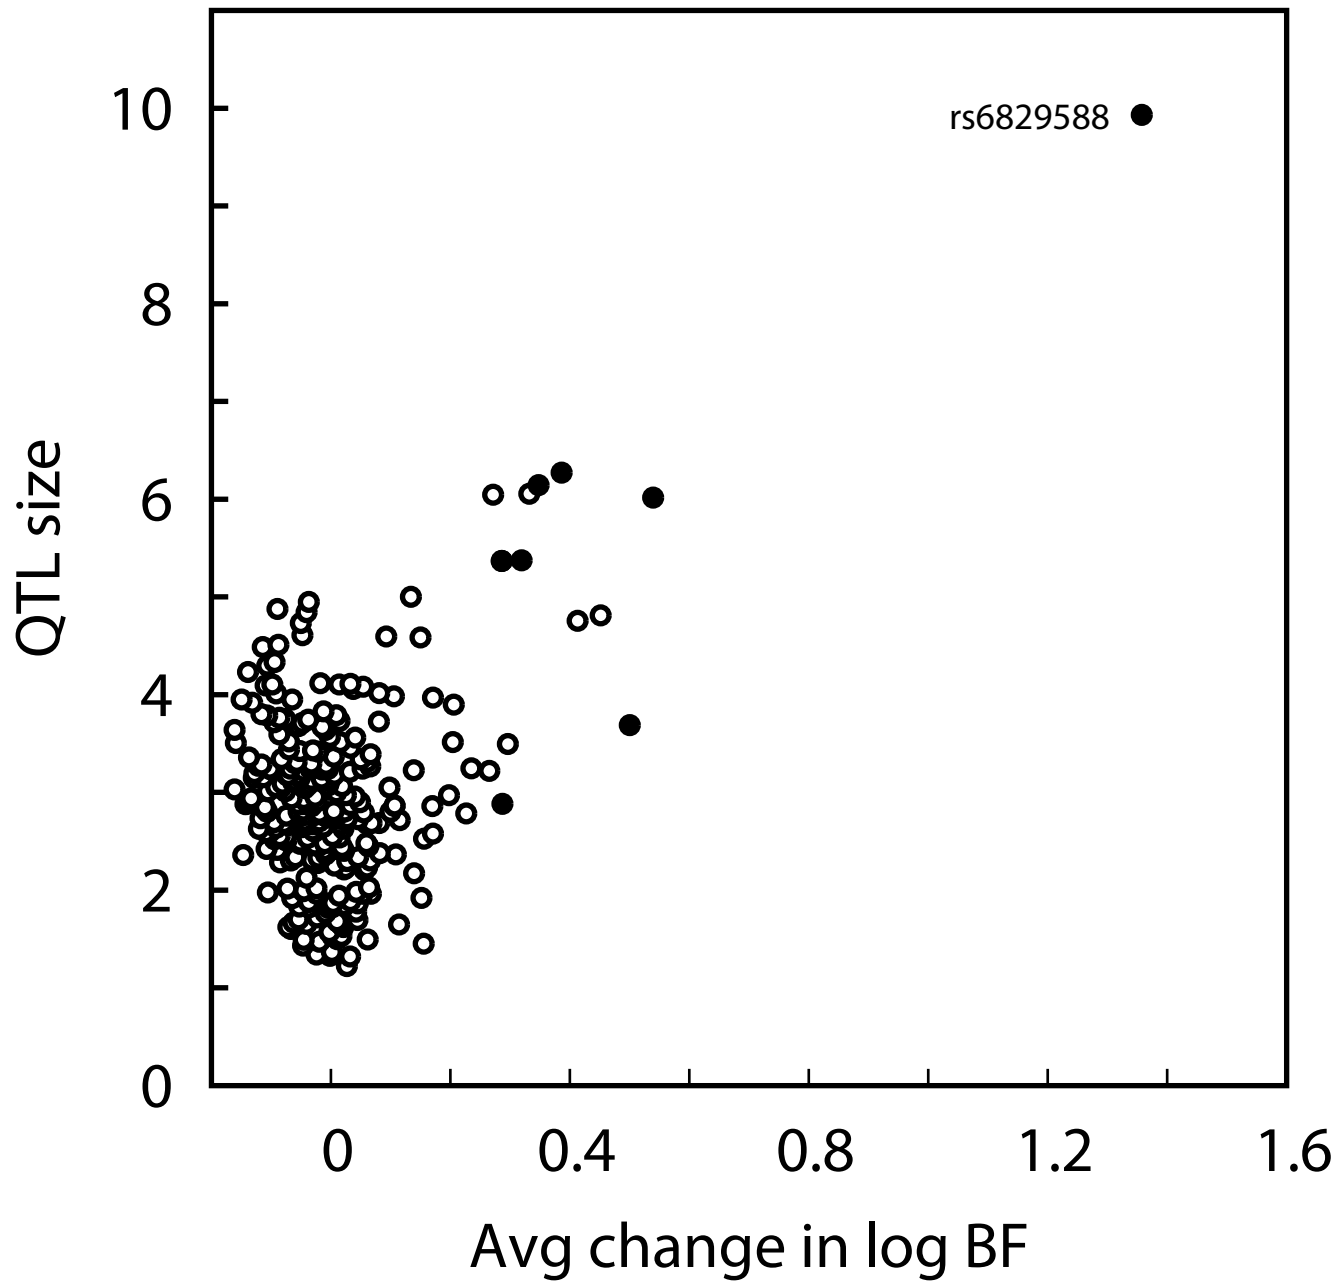

Type of file: table

Label: table

Filename: 197795 - Supplementary tables 1 and 2.pdf

**Supplementary Table 1. Trait mode-of-inheritance models for apoB: selected models evaluated in the case of CSA, and sub-models with highest posterior probabilities from OSA.**

| Approach | Model            | $p_1$ | $\mu_{11}$ | $\mu_{12}$ | $\mu_{22}$ | $V_g$  | $V_e$  | $V_g/V_t$ | Support |
|----------|------------------|-------|------------|------------|------------|--------|--------|-----------|---------|
| CSA      | Dominant         | 0.68  | -4.89      | -4.89      | 24.75      | 80.75  | 168.74 | 0.53      | 1631.08 |
|          | General          | 0.89  | -6.0       | 9.86       | 52.83      | 76.56  | 162.82 | 0.51      | 1622.51 |
|          | Dominant, mixed* | 0.71  | -5.68      | -5.68      | 28.73      | 91.20  | 75.72  | 0.30      | 1619.69 |
|          | General mixed    | 0.71  | -4.98      | -6.50      | 28.28      | 89.27  | 72.22  | 0.49      | 1619.53 |
| OSA**    | Model 1          | 0.83  | -2.47      | 9.97       | 58.58      | 123.43 | 102.85 | 0.39      | 0.38    |
|          | Model 2          | 0.64  | -0.25      | 0.33       | 25.04      | 70.48  | 102.85 | 0.23      | 0.28    |
|          | Model 3          | 0.45  | 1.17       | 16.95      | 11.38      | 36.00  | 102.85 | 0.12      | 0.19    |

$V_g$ : genetic variance explained by major gene model

$V_e$ : residual variance

$V_g/V_t$ : total fraction of phenotypic variance explained by the major gene

Support: -2 log Likelihood for CSA models; posterior probability for OSA models

\* model used for parametric linkage analyses

\*\* Model parameters conditional on the existence of the specific QTL model in the oligogenic model space

**Supplementary Table 2. Lod scores obtained for analysis with individual markers for family F3, using a parametric lod score approach with model parameters from complex segregation analysis indicated in Supplementary Table 1.**

| Marker  | Position (cM) | Recombination fraction |       |       |       |       |       |       |       |        |
|---------|---------------|------------------------|-------|-------|-------|-------|-------|-------|-------|--------|
|         |               | 0                      | 0.01  | 0.02  | 0.05  | 0.1   | 0.15  | 0.2   | 0.3   | 0.4    |
| D4S2366 | 14.58         | -5.16                  | -4.28 | -3.74 | -2.76 | -1.85 | -1.26 | -0.85 | -0.34 | -0.08  |
| D4S403  | 37.30         | -4.46                  | -2.78 | -2.30 | -1.56 | -0.94 | -0.60 | -0.38 | -0.15 | -0.06  |
| D4S2639 | 29.22         | -2.28                  | -2.03 | -1.82 | -1.36 | -0.88 | -0.58 | -0.39 | -0.16 | -0.06  |
| D4S2397 | 47.48         | -4.23                  | -3.16 | -2.72 | -1.98 | -1.29 | -0.87 | -0.58 | -0.23 | -0.06  |
| D4S2632 | 55.88         | -6.78                  | -4.51 | -3.75 | -2.57 | -1.63 | -1.09 | -0.74 | -0.29 | -0.07  |
| D4S1627 | 66.43         | -7.23                  | -4.32 | -3.63 | -2.57 | -1.67 | -1.12 | -0.75 | -0.29 | -0.07  |
| D4S3248 | 80.30         | 0.34                   | 0.34  | 0.33  | 0.31  | 0.28  | 0.24  | 0.19  | 0.11  | 0.04   |
| D4S2367 | 86.56         | -6.60                  | -4.27 | -3.68 | -2.73 | -1.83 | -1.24 | -0.84 | -0.34 | -0.09  |
| D4S3243 | 97.46         | -5.97                  | -4.00 | -3.41 | -2.39 | -1.49 | -0.97 | -0.62 | -0.22 | -0.04  |
| D4S2361 | 102.85        | -3.03                  | -2.43 | -2.08 | -1.44 | -0.86 | -0.53 | -0.32 | -0.11 | -0.03  |
| D4S1647 | 115.61        | -1.87                  | -1.74 | -1.62 | -1.33 | -0.98 | -0.72 | -0.52 | -0.23 | -0.06  |
| D4S2623 | 125.54        | -2.96                  | -1.64 | -1.34 | -0.94 | -0.61 | -0.41 | -0.28 | -0.10 | -0.01  |
| D4S2394 | 143.90        | 0.15                   | 0.18  | 0.21  | 0.27  | 0.33  | 0.33  | 0.31  | 0.19  | 0.07   |
| D4S1644 | 159.06        | 2.83                   | 2.79  | 2.76  | 2.63  | 2.37  | 2.08  | 1.76  | 1.10  | 0.44   |
| D4S1625 | 161.80        | 2.99                   | 2.93  | 2.86  | 2.68  | 2.35  | 2.03  | 1.69  | 1.03  | 0.41   |
| D4S1629 | 175.24        | 2.79                   | 2.72  | 2.65  | 2.45  | 2.12  | 1.78  | 1.45  | 0.82  | 0.29   |
| D4S2368 | 185.71        | 2.39                   | 2.33  | 2.28  | 2.10  | 1.81  | 1.51  | 1.22  | 0.68  | 0.24   |
| D4S2431 | 195.09        | 1.37                   | 1.44  | 1.47  | 1.48  | 1.36  | 1.17  | 0.96  | 0.55  | 0.20   |
| D4S2417 | 201.15        | -0.74                  | -0.35 | -0.09 | 0.34  | 0.63  | 0.70  | 0.67  | 0.45  | 0.17   |
| D4S408  | 216.00        | -1.04                  | -0.69 | -0.45 | -0.03 | 0.28  | 0.39  | 0.41  | 0.30  | 0.12   |
| D4S1652 | 230.68        | -4.38                  | -2.75 | -2.17 | -1.32 | -0.69 | -0.38 | -0.20 | -0.04 | -0.002 |
